# Supplementary material
Source: PubMed Central journal article supplement (PMC2782284)
Supplement: tpc.109.069948_1.pdf [file tpc.109.069948_1.pdf]

## Supplemental figure 2

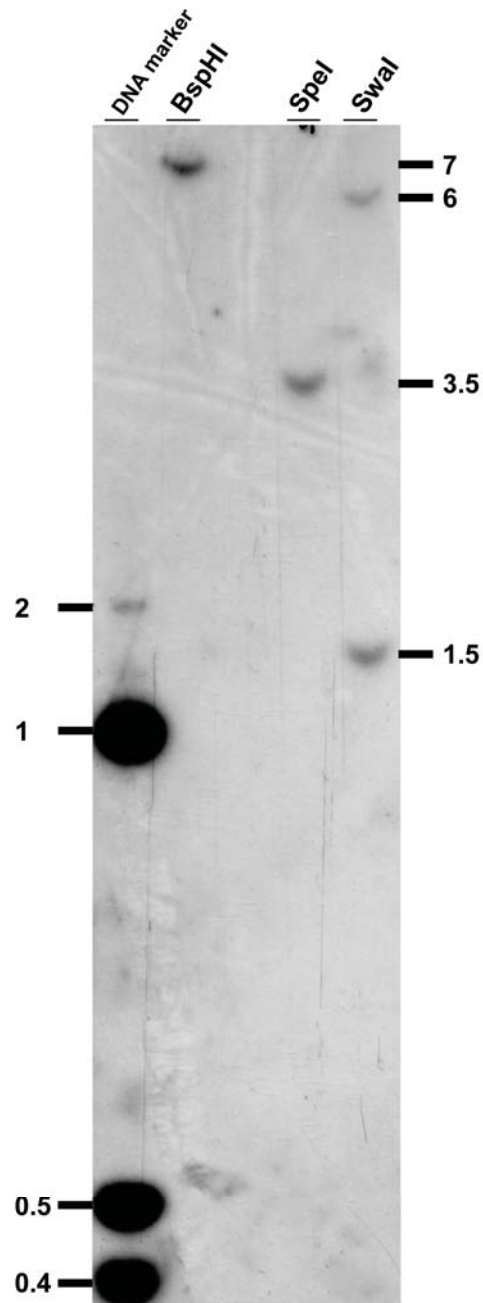

**Supplemental figure 2.** Southern blot analysis of *SIJAG* in tomato. Southern blot analysis of BspHI, SpeI and SwaI digests of DNA isolated from VF36 tomato cultivar. BspHI, SpeI cut outside of *SIJAG* sequence, while SwaI cuts in the middle of the gene. Band sizes of the DNA ladder indicated on the right and left are in Kb.

## Supplemental figure 3

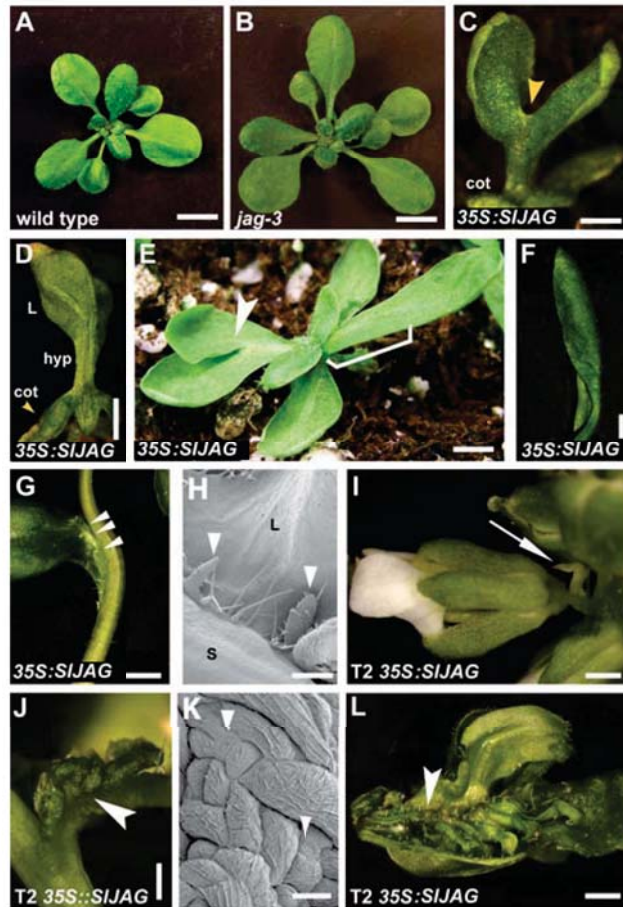

**Supplemental figure 3.** Function of *SLJAG* in *A. thaliana* transgenic plants. (A) and (B) Wild-type and *jag-3* young plants, respectively. (C) to (L) Phenotypes of *35S:SLJAG* in *jag-3* background. *35S:LYR* displayed similar phenotypes in *jag-2*, *jag-3* and wild-type which were similar to *35S:JAG* plants. Many of the plants had retarded overall development compared to wild-type, *jag-2* or *jag-3*. (C) Fused first true leaves with no meristem (arrowhead). (D) Fused tri-cotyledons (arrowhead) and fused first leaves. (E) Ectopic blade on petiole growth (bracket) and a divided leaf (arrowhead). Ectopic blade on petiole phenotype resembled the *blade on petiole (bop)* and *lettuce (let)* mutant phenotypes (van der Graaff et al., 2000; Hepworth et al., 2005; Norberg et al., 2005). (F) Folded leaf with extra growth along the margin. (G) A leaf fused to a stem with ectopic leaves growing on the joint (arrowheads). (H) SEM image of ectopic leaves (arrowheads) on the leaf-stem joint showing trichomes. (I) Leaf-like structure forming on the adaxial side of a pedicel of a wild-type looking flower in a T2 transgenic line. All plants that produced flowers showed suppression of the *jag* flower phenotype. (J) Ectopic tissue forming on the adaxial side of a pedicel. Bract formation was not evident. (K) SEM image of (J) showing stomata (arrowheads) but no trichome development. The developing tissue resembles sepal epidermal cells (Bowman, 1993). (L) A petiole of a rosette leaf with ectopic growth of leaves (arrowhead), resembling *JAG* gain-of-function allele *jag-5D* (Dinneny et al., 2004). hyp, hypocotyl; cot, cotyledons; L, leaves; S, stem. Bars: 1 cm in (A), (B) and (E), 1 mm in (C), (D), (F), (G) and (J), 100 $\mu$ m in (H), 500  $\mu$ m in (I), 30  $\mu$ m in (K), 2 mm in (L).

## Supplemental figure 4

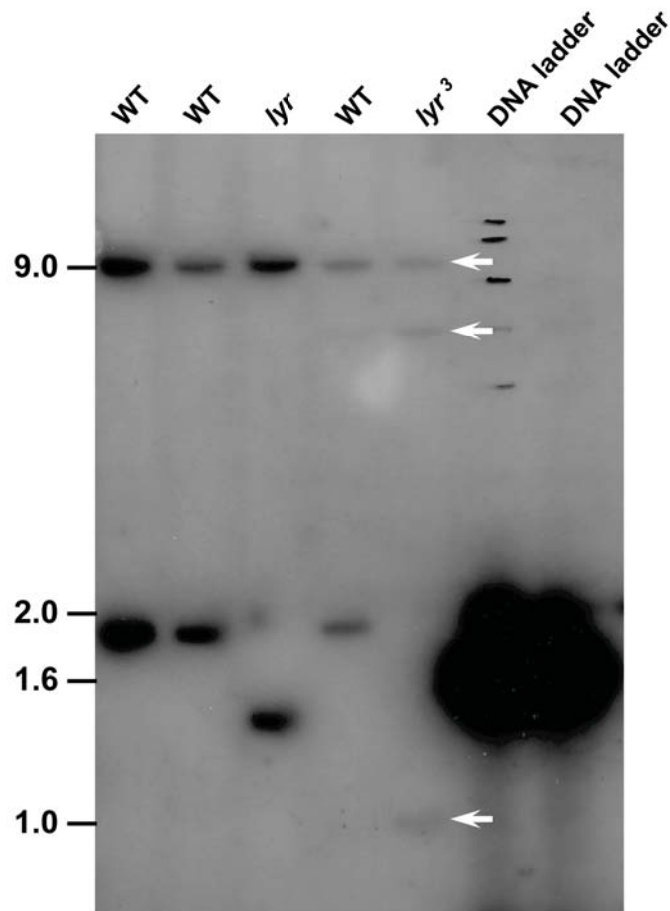

**Supplemental figure 4.** Southern blot analysis revealing altered *SIJAG* gene in *lyr* and *lyr3* tomato mutants. Genomic DNA of VF36 (first WT from left), wild-type (second WT from left), *lyr*, M82 and *lyr3* was digested with *Swa*I and hybridized with *SIJAG* probe. White arrows indicate three bands of *lyr3* allele. The two lanes on the right are the DNA ladder. Numbers on the left indicate band size in kb.

## Supplemental figure 5

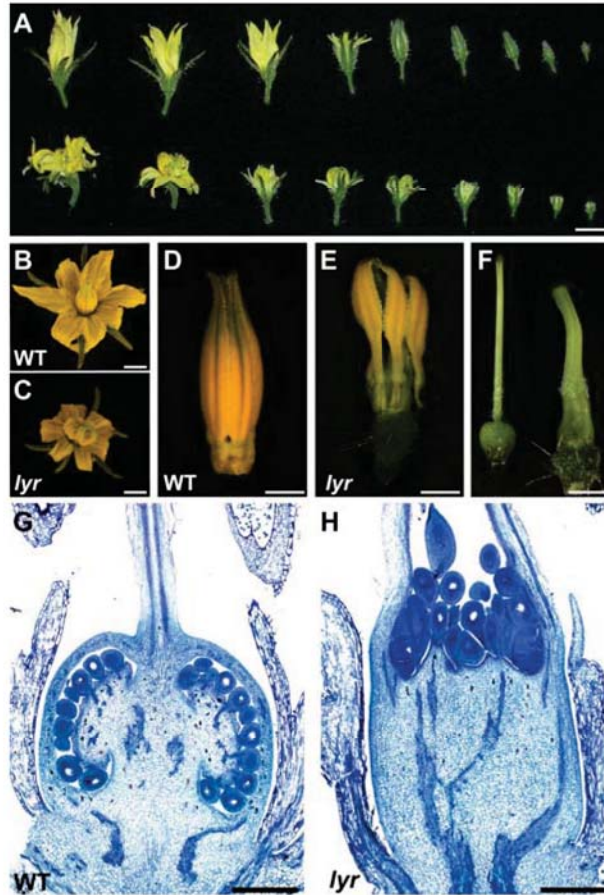

**Supplemental figure 5.** *lyrate* flower phenotype. (A) Floral developmental series in wild-type (upper row) and *lyr* (lower row). Mature flowers of wild-type (B) and *lyr* (C). *lyr* flowers open prematurely and have reflexed petals. (D) and (E) Stamen of wild-type (D) and *lyr* (E) with the two outer whorls peeled away. Wild-type tomato stamens are fused to form a cone surrounding the carpel, but *lyr* anthers are narrow and unfused curving inwardly towards the carpel. (F) Carpel of wild-type (left) and *lyr* (right). *lyr* carpel are composed of a thickened style with unfused carpel sand an enlarged ovary containing disorganized ovules. (G) and (H) Longitudinal section of ovaries of wild-type (G) and *lyr* (H). Bars: 1 cm in (A), 0.5 cm in (B) and (C), 3 mm in (D) to (F) and 1 mm in (G) and (H).

## Supplemental figure 6

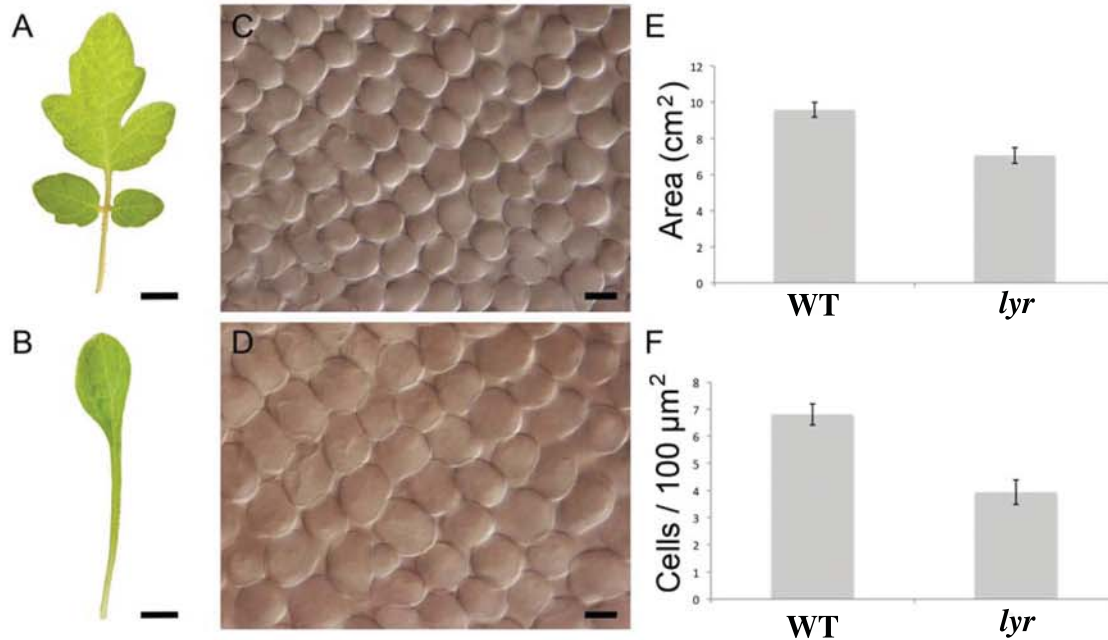

**Supplemental Figure 6 .** Representative examples of wild type (A) and *lyr* (B) leaves used for area measurements and cell counts. Laminar tissue cell density was higher in wild type (C) when compared to *lyr* (D). Quantitation of terminal leaflet area (E) (n=9 for wild type and n=10 for *lyr*) and cell density (F) (n=12 for wild type and n=13 for *lyr*) in wild type and *lyr* leaves. Error bars in (E-F) indicate standard error. Scale bars are 2 cm (A-B) and 2.5 μm (C-D).

## Supplemental figure 7

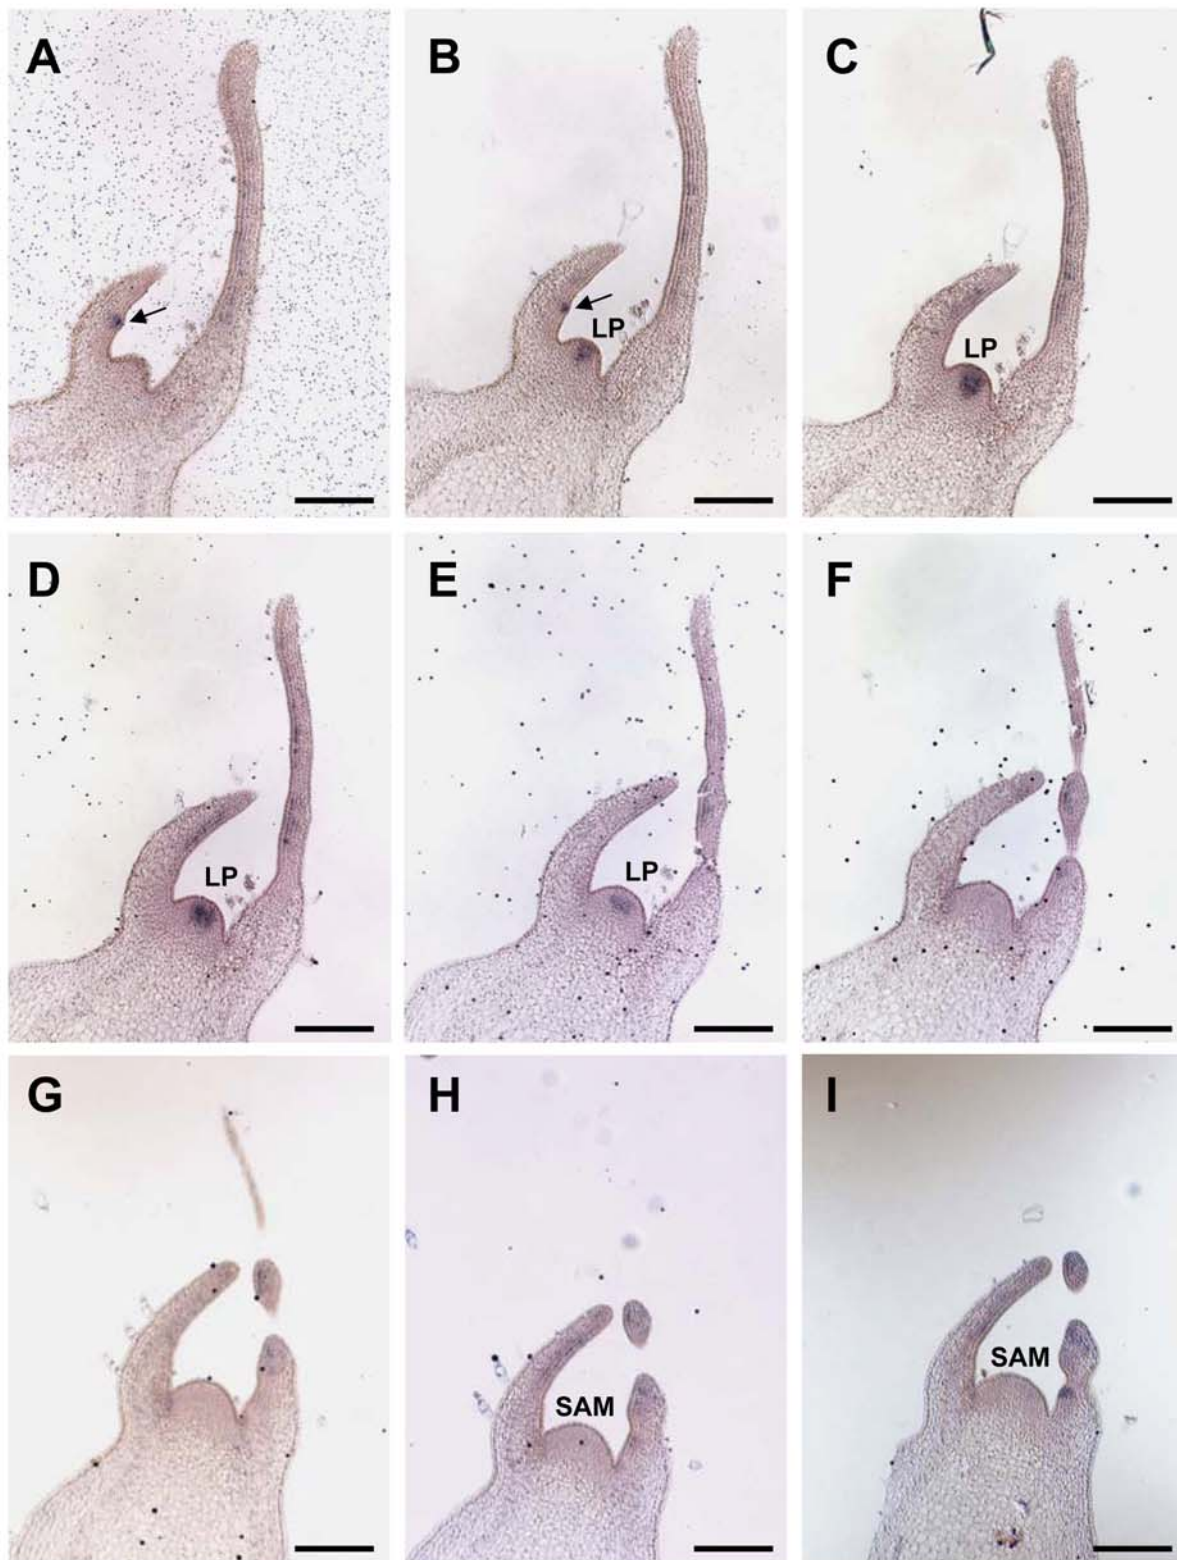



**Supplemental figure 7.** *LZR* expression pattern in an apex of wild-type tomato. (A) to (I) *in situ* hybridization on serial sections of a wild-type tomato apex showing expression in distal tissue of the leaf primordium (LP, [B] to [E]) but not in the shoot apical meristem (SAM [G] to [I]). Arrows in (A) and (B) indicate leaflet initiation site. Bars = 250  $\mu$ m.

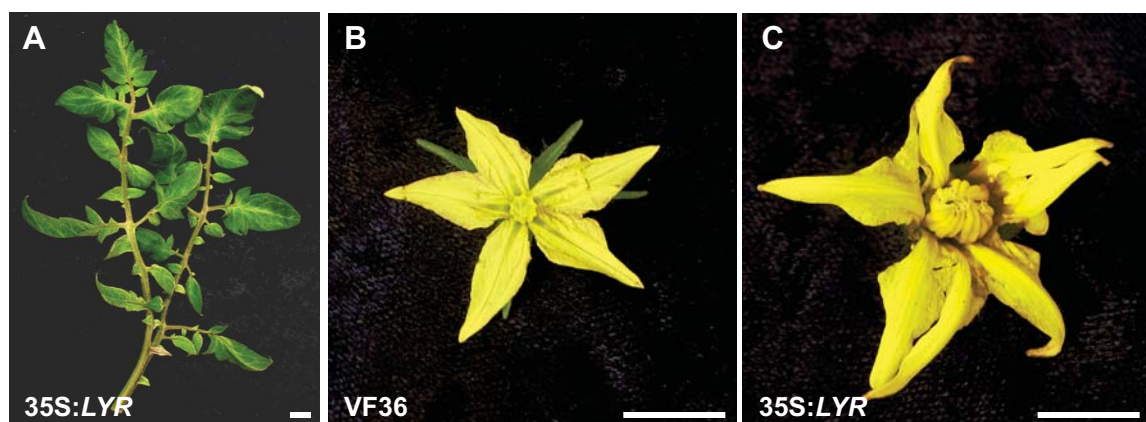

**Supplemental figure 8.** Additional *35S:LYRATE* phenotypes. (A) Bifurcated leaf. (B) WT flower. (C) Enlarged *lyr* flower. Bars are equivalent to 1 cm.

## Supplemental Table 1:

| Transcript | Forward primer              | Reverse Primer              |
|------------|-----------------------------|-----------------------------|
| GAPDH      | GGTGCTGACTTCGTTGTTG         | GCTCTGGCTTGTATTCATTCTC      |
| SIJAG      | TGAACCGCCACCGTCAAGAG        | CATGAGGAATTGGAGGACAACCTAAGG |
| IAA4       | TATGAAGACAAGGATGGTGATTG     | ACCTTTAGCTTCAGATCCTTTG      |
| IAA9       | GCCTTCTGCTGTGAATGATGCCTC    | TTCCGTCAACCTCTTCGTTATTCTTCG |
| LeT6       | GGCTCATCCTCACTACCATCGTCTC   | ATTCCACCACCCTACTACTACTGCTAC |
| TKN1       | TGAAGGCCCTTTTCGTTTGGGT      | CCTTGTGCTTAGGCCTATAAGGCTTG  |
| PIN1       | CTCAAGAAGAGACCAAGGCAACTG    | AGAGACCAAGGACCAAGTTAGGC     |
| IAA3       | GTTAGCATGGATGGAGCACCTTATTTG | CCTTCTCTTCTGAATACACTCCAATAG |

**Supplemental Table 1** Primers used in this study

Bowman, J.L. (1993). *Arabidopsis: An Atlas of Morphology and Development*. (New York: Springer-Verlag.).

Hepworth, S.R., Zhang, Y., McKim, S., Li, X., and Haughn, G.W. (2005). BLADE-ON-PETIOLE-Dependent Signaling Controls Leaf and Floral Patterning in *Arabidopsis*. *Plant Cell* 17, 1434-1448.

Norberg, M., Holmlund, M., and Nilsson, O. (2005). The BLADE ON PETIOLE genes act redundantly to control the growth and development of lateral organs. *Development* 132, 2203-2213.

van der Graaff, E., Dulk-Ras, A.D., Hooykaas, P.J., and Keller, B. (2000). Activation tagging of the LEAFY PETIOLE gene affects leaf petiole development in *Arabidopsis thaliana*. *Development* 127, 4971-4980.
